# Supplementary material
Source: PubMed Central journal article supplement (PMC5460717)
Supplement: CJN.11971116SupplementaryData.pdf [file CJN.11971116SupplementaryData.pdf]

*Supplemental material is neither peer-reviewed nor thoroughly edited by CJASN. The authors alone are responsible for the accuracy and presentation of the material.*

## Albuminuria, Proteinuria, and Renal Disease Progression in Children with CKD

Dana Y. Fuhrman, DO, MS, Pediatrics, Division of Pediatric Nephrology, Children's Hospital of Pittsburgh of UPMC

Michael F. Schneider, MS, Epidemiology, Johns Hopkins Bloomberg School of Public Health

Katherine M. Dell, MD, Center for Pediatric Nephrology, Cleveland Clinic Children's, Pediatrics, Case Western Reserve University

Tom D. Blydt-Hansen, MD, Pediatrics, Division of Nephrology, BC Children's Hospital, Vancouver, Canada

Robert Mak, MD, PhD, Division of Pediatric Nephrology, University of California, San Diego, Rady Children's Hospital

Jeffrey Saland, MD, Pediatrics, Division of Nephrology and Hypertension, The Icahn School of Medicine at Mount Sinai

Susan L. Furth, MD, PhD, Pediatrics, Division of Nephrology, Children's Hospital of Philadelphia

Bradley A. Warady, MD, Pediatrics, Division of Nephrology, Children's Mercy Hospital

Marva M. Moxey-Mims, MD, National Institute of Diabetes and Digestive and Kidney Diseases, National Institutes of Health

George J. Schwartz, MD, Pediatrics, Division of Nephrology, University of Rochester Medical Center

*Supplemental material is neither peer-reviewed nor thoroughly edited by CJASN. The authors alone are responsible for the accuracy and presentation of the material.*

## Supplemental Material

**Supplemental Table 1.** Multivariable<sup>a</sup> Linear Regression Analysis of index visit values of estimated glomerular filtration rate (eGFR) on urine protein/creatinine (mg/mg) and urine albumin/creatinine (mg/g) for 289 patients not on an ACE and/or ARB.

| Exposure                                                         | No. | Mean eGFR (ml/min/1.73m <sup>2</sup> )<br>relative to reference | 95% Confidence<br>Interval |
|------------------------------------------------------------------|-----|-----------------------------------------------------------------|----------------------------|
| Urine protein/creatinine < 0.2 and urine albumin/creatinine < 30 | 97  | (reference)                                                     | --                         |
| Urine protein/creatinine < 0.2 and urine albumin/creatinine ≥ 30 | 28  | -5.2                                                            | -13.0 to 2.6               |
| Urine protein/creatinine ≥ 0.2 and urine albumin/creatinine < 30 | 14  | -10.2                                                           | -20.5 to 0.2               |
| Urine protein/creatinine ≥ 0.2 and urine albumin/creatinine ≥ 30 | 150 | -21.0                                                           | -25.9 to -16.0             |

<sup>a</sup> Adjusted for age, sex, race, CKD etiology, hypertension status, and body mass index.
